# Supplementary material for: A new method of mark detection for software-based optical mark recognition
Source: PubMed Central journal article supplement (PMC6226159; doi:10.1371/journal.pone.0206420), 2018-11-09
Supplement: pone.0206420.s001.pdf [file pone.0206420.s001.pdf]

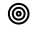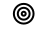

# Post-Parathyroidectomy Study Form

## Section 1 - Patient Information

1 NRIC       -   -

2 Gender Male  Female

3 Ethnicity Malay  Indian   
Chinese  Others

## Section 2 - Inclusion and Exclusion Criteria

### Inclusion Criteria

1 Renal hyperparathyroidism Yes  No   
2 Single lesion surgically removed Lesion either adenoma or carcinoma Yes  No

### Exclusion Criteria

3 Oestrogens / Raloxifen Yes  No   
4 Age < 16 years Yes  No   
5 Pregnant Yes  No

### Others

6 Vitamin D derivatives Yes  No

Detachable Margin

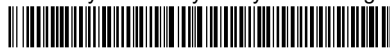

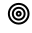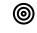

**Section 3 - Pre-operative data**

1 Patient age

*(Use highest level of iPTH, calcium, and ALP where more than one result exists)*

2 iPTH (pmol/L)  .

3 Corr. Calcium (mmol/L)  .

4 Calcium (mmol/L)  .

5 Albumin (g/L)  .

6 ALP (U/L)

7 Lesion size (cm)  
 .  width       .  depth       .  height

**OR**  .   
cc

8 Bisphosphonate used Yes No  
(A) (B)

Detachable Margin

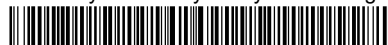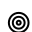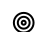

**Section 4 - Post-operative data**

**1 Date of operation**

|       |                      |                                |                                |                                |                                |                                |                                |                                |                                |                                |                                |
|-------|----------------------|--------------------------------|--------------------------------|--------------------------------|--------------------------------|--------------------------------|--------------------------------|--------------------------------|--------------------------------|--------------------------------|--------------------------------|
| Day   | <input type="text"/> | <input type="text" value="0"/> | <input type="text" value="1"/> | <input type="text" value="2"/> | <input type="text" value="3"/> | <input type="text" value="4"/> | <input type="text" value="5"/> | <input type="text" value="6"/> | <input type="text" value="7"/> | <input type="text" value="8"/> | <input type="text" value="9"/> |
|       | <input type="text"/> | <input type="text" value="0"/> | <input type="text" value="1"/> | <input type="text" value="2"/> | <input type="text" value="3"/> | <input type="text" value="4"/> | <input type="text" value="5"/> | <input type="text" value="6"/> | <input type="text" value="7"/> | <input type="text" value="8"/> | <input type="text" value="9"/> |
| Month | <input type="text"/> | <input type="text" value="0"/> | <input type="text" value="1"/> | <input type="text" value="2"/> | <input type="text" value="3"/> | <input type="text" value="4"/> | <input type="text" value="5"/> | <input type="text" value="6"/> | <input type="text" value="7"/> | <input type="text" value="8"/> | <input type="text" value="9"/> |
|       | <input type="text"/> | <input type="text" value="0"/> | <input type="text" value="1"/> | <input type="text" value="2"/> | <input type="text" value="3"/> | <input type="text" value="4"/> | <input type="text" value="5"/> | <input type="text" value="6"/> | <input type="text" value="7"/> | <input type="text" value="8"/> | <input type="text" value="9"/> |
| Year  | <input type="text"/> | <input type="text" value="0"/> | <input type="text" value="1"/> | <input type="text" value="2"/> | <input type="text" value="3"/> | <input type="text" value="4"/> | <input type="text" value="5"/> | <input type="text" value="6"/> | <input type="text" value="7"/> | <input type="text" value="8"/> | <input type="text" value="9"/> |
|       | <input type="text"/> | <input type="text" value="0"/> | <input type="text" value="1"/> | <input type="text" value="2"/> | <input type="text" value="3"/> | <input type="text" value="4"/> | <input type="text" value="5"/> | <input type="text" value="6"/> | <input type="text" value="7"/> | <input type="text" value="8"/> | <input type="text" value="9"/> |

**2 Discharge Date**

|       |                      |                                |                                |                                |                                |                                |                                |                                |                                |                                |                                |
|-------|----------------------|--------------------------------|--------------------------------|--------------------------------|--------------------------------|--------------------------------|--------------------------------|--------------------------------|--------------------------------|--------------------------------|--------------------------------|
| Day   | <input type="text"/> | <input type="text" value="0"/> | <input type="text" value="1"/> | <input type="text" value="2"/> | <input type="text" value="3"/> | <input type="text" value="4"/> | <input type="text" value="5"/> | <input type="text" value="6"/> | <input type="text" value="7"/> | <input type="text" value="8"/> | <input type="text" value="9"/> |
|       | <input type="text"/> | <input type="text" value="0"/> | <input type="text" value="1"/> | <input type="text" value="2"/> | <input type="text" value="3"/> | <input type="text" value="4"/> | <input type="text" value="5"/> | <input type="text" value="6"/> | <input type="text" value="7"/> | <input type="text" value="8"/> | <input type="text" value="9"/> |
| Month | <input type="text"/> | <input type="text" value="0"/> | <input type="text" value="1"/> | <input type="text" value="2"/> | <input type="text" value="3"/> | <input type="text" value="4"/> | <input type="text" value="5"/> | <input type="text" value="6"/> | <input type="text" value="7"/> | <input type="text" value="8"/> | <input type="text" value="9"/> |
|       | <input type="text"/> | <input type="text" value="0"/> | <input type="text" value="1"/> | <input type="text" value="2"/> | <input type="text" value="3"/> | <input type="text" value="4"/> | <input type="text" value="5"/> | <input type="text" value="6"/> | <input type="text" value="7"/> | <input type="text" value="8"/> | <input type="text" value="9"/> |
| Year  | <input type="text"/> | <input type="text" value="0"/> | <input type="text" value="1"/> | <input type="text" value="2"/> | <input type="text" value="3"/> | <input type="text" value="4"/> | <input type="text" value="5"/> | <input type="text" value="6"/> | <input type="text" value="7"/> | <input type="text" value="8"/> | <input type="text" value="9"/> |
|       | <input type="text"/> | <input type="text" value="0"/> | <input type="text" value="1"/> | <input type="text" value="2"/> | <input type="text" value="3"/> | <input type="text" value="4"/> | <input type="text" value="5"/> | <input type="text" value="6"/> | <input type="text" value="7"/> | <input type="text" value="8"/> | <input type="text" value="9"/> |

**3 Date Calcium Stable**

|       |                      |                                |                                |                                |                                |                                |                                |                                |                                |                                |                                |
|-------|----------------------|--------------------------------|--------------------------------|--------------------------------|--------------------------------|--------------------------------|--------------------------------|--------------------------------|--------------------------------|--------------------------------|--------------------------------|
| Day   | <input type="text"/> | <input type="text" value="0"/> | <input type="text" value="1"/> | <input type="text" value="2"/> | <input type="text" value="3"/> | <input type="text" value="4"/> | <input type="text" value="5"/> | <input type="text" value="6"/> | <input type="text" value="7"/> | <input type="text" value="8"/> | <input type="text" value="9"/> |
|       | <input type="text"/> | <input type="text" value="0"/> | <input type="text" value="1"/> | <input type="text" value="2"/> | <input type="text" value="3"/> | <input type="text" value="4"/> | <input type="text" value="5"/> | <input type="text" value="6"/> | <input type="text" value="7"/> | <input type="text" value="8"/> | <input type="text" value="9"/> |
| Month | <input type="text"/> | <input type="text" value="0"/> | <input type="text" value="1"/> | <input type="text" value="2"/> | <input type="text" value="3"/> | <input type="text" value="4"/> | <input type="text" value="5"/> | <input type="text" value="6"/> | <input type="text" value="7"/> | <input type="text" value="8"/> | <input type="text" value="9"/> |
|       | <input type="text"/> | <input type="text" value="0"/> | <input type="text" value="1"/> | <input type="text" value="2"/> | <input type="text" value="3"/> | <input type="text" value="4"/> | <input type="text" value="5"/> | <input type="text" value="6"/> | <input type="text" value="7"/> | <input type="text" value="8"/> | <input type="text" value="9"/> |
| Year  | <input type="text"/> | <input type="text" value="0"/> | <input type="text" value="1"/> | <input type="text" value="2"/> | <input type="text" value="3"/> | <input type="text" value="4"/> | <input type="text" value="5"/> | <input type="text" value="6"/> | <input type="text" value="7"/> | <input type="text" value="8"/> | <input type="text" value="9"/> |
|       | <input type="text"/> | <input type="text" value="0"/> | <input type="text" value="1"/> | <input type="text" value="2"/> | <input type="text" value="3"/> | <input type="text" value="4"/> | <input type="text" value="5"/> | <input type="text" value="6"/> | <input type="text" value="7"/> | <input type="text" value="8"/> | <input type="text" value="9"/> |

**4 Trough Calcium (mmol/L)**  
*(Lowest documented calcium level in the immediate post-operative period)*

|                      |                      |   |                      |                      |
|----------------------|----------------------|---|----------------------|----------------------|
| <input type="text"/> | <input type="text"/> | . | <input type="text"/> | <input type="text"/> |
|----------------------|----------------------|---|----------------------|----------------------|

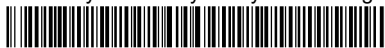

Detachable Margin
